1 March 6, 2018

2

3 **Scaffolding of RhoA contractile signaling by anillin: a regulatory analogue of**  
4 **kinetic proofreading**

5

6 Srikanth Budnar<sup>1, 5</sup>, Kabir B. Husain<sup>2</sup>, Guillermo A. Gomez<sup>1,3,4</sup>, Maedeh Naghibosidat<sup>1</sup>,  
7 Suzie Verma<sup>1</sup>, Nicholas A. Hamilton<sup>1</sup>, Richard G. Morris<sup>2,5</sup> and Alpha S. Yap<sup>1</sup>,

8

9 <sup>1</sup>Division of Cell Biology and Molecular Medicine, Institute for Molecular Bioscience,  
10 The University of Queensland, St. Lucia, Brisbane, Queensland, Australia 4072;

11

12 <sup>2</sup>Simons Centre for the Study of Living Machines, National Centre for Biological  
13 Sciences, Tata Institute for Fundamental Research, 560065 Bangalore, India; and

14

15 <sup>3,4</sup>Centre for Cancer Biology, SA Pathology and University of South Australia, Adelaide  
16 SA 5000.

17

18 <sup>4</sup> Present address

19 <sup>5</sup> Authors for correspondence:

20 [s.budnar@imb.uq.edu.au](mailto:s.budnar@imb.uq.edu.au)

21 [richardgm@ncbs.res.in](mailto:richardgm@ncbs.res.in)

22

23 Short title: Understanding scaffolding by anillin

24 Keywords: Anillin, RhoA, Myosin II, cell cortex

25

26

27 **Abstract**

28

29 *Scaffolding is a fundamental principle of cell signaling commonly thought to involve*  
30 *multi-domain proteins that tether different components of a pathway together into a*  
31 *complex*<sup>1,2</sup>. *We now report an alternative mechanism for scaffolding that is necessary*  
32 *for RhoA-mediated contractile signaling. We find that anillin binding stabilizes active,*  
33 *GTP-RhoA, and promotes contractility at both the epithelial zonula adherens (ZA) and*

34 *the cytokinetic furrow. However, anillin does not conform to the classical picture of a*  
35 *multi-domain tether, since its RhoA-binding AH domain alone was sufficient to promote*  
36 *contractile signaling. Moreover, anillin competes with contractile effectors for a common*  
37 *site on RhoA, presenting the conundrum of how an inhibitory interaction can otherwise*  
38 *promote signaling. To explain this, we propose that inactivation of RhoA is non-*  
39 *Poissonian, having a rate that increases with time, unless the process is reset via*  
40 *transient binding to anillin. Repeated cycles of binding and un-binding therefore*  
41 *increase cortical residence times of non-sequestered GTP-RhoA and hence the*  
42 *probability of engaging contractile effectors. We identify the modification of the local lipid*  
43 *environment as a potential mechanism underlying such non-Poisson statistics, and*  
44 *demonstrate agreement with a minimal cellular system. Finally, we show that Myosin II*  
45 *anchors anillin at the cortex to form a feedback pathway that enhances RhoA signaling.*  
46 *This new paradigm of scaffolding is a regulatory analogue of kinetic proofreading and*  
47 *may be employed by other binding proteins that do not fit the classical picture.*

48

49 Cellular contractility requires strict spatio-temporal control of signaling within cells.  
50 Contractile zones such as the cytokinetic furrow and zonula adherens (ZA) of epithelial  
51 cells are controlled by localized RhoA, which, in its active, GTP-loaded form, recruits  
52 multiple effector proteins to assemble and maintain the actomyosin apparatus at the cell  
53 cortex <sup>3</sup>. In turn, GTP-RhoA is classically thought to be controlled by molecules that  
54 regulate its generation, inactivation, or dissociation from the membrane. Anillin is a  
55 putative scaffold, first identified at the contractile furrow during cytokinesis <sup>4,5</sup> and  
56 increasingly implicated in contractility elsewhere, such as at cell-cell junctions in  
57 *Xenopus* embryos <sup>6</sup> and as a component of the E-cadherin interactome <sup>7</sup>. Anillin can  
58 interact with a diverse range of proteins, notably directly with GTP-RhoA, F-actin, and  
59 non-muscle Myosin II (NMII) <sup>8-10</sup>. Thus, anillin has been thought to function as a RhoA  
60 effector, being recruited to the cortex by active RhoA, then regulating contractility by  
61 binding F-actin and NMII <sup>5,9</sup>.

62 Anillin preferentially localized with actomyosin at the ZA of confluent MCF-7  
63 epithelial cells (Fig. 1a; Extended data Fig. 1a) and junctional tension, measured by  
64 recoil following laser ablation, was reduced by anillin shRNA (knock-down, KD) (Fig.  
65 1b,c; Extended Data Fig. 1b). This suggested that anillin contributes to junctional  
66 contractility, a conclusion that was reinforced by reduced levels of actomyosin and the

67 RhoA effectors, ROCK1 and mDia1, at anillin KD junctions (Extended Data Fig. 1c, e-i).  
68 The specificity of anillin KD was confirmed by reconstitution with an RNAi-resistant WT  
69 anillin transgene (anillin<sup>WT</sup>). Interestingly, junctional NMIIA was also recovered in KD  
70 cells expressing an anillin mutant lacking the actin-binding domain, but not when either  
71 the NMII-binding domain (anillin<sup>ΔMyo</sup>) or the AH domain (anillin<sup>ΔAH</sup>) were deleted (Fig. 1f;  
72 Extended Data Fig. 2 a,f). However, when corrected for junctional levels of the  
73 transgenes, anillin<sup>ΔMyo</sup> restored junctional NMIIA as effectively as anillin<sup>WT</sup>, but a defect  
74 persisted with the ΔAH mutant (Extended Data Fig. 2 g). This suggested that the NMII-  
75 binding domain might function by localizing anillin while the AH domain supported  
76 another mechanism.

77 One possibility was that the AH domain regulated RhoA itself, which is essential  
78 for junctional contractility<sup>11</sup>. We tested this using AHPH, a location biosensor for GTP-  
79 RhoA<sup>9,12</sup> that derives from the C-terminus of anillin, but does not compete with anillin<sup>WT</sup>  
80 for junctional localization (Extended Data Fig. 2 h,i). Anillin co-accumulated with AHPH  
81 and TCA-resistant RhoA staining at the ZA (Extended Data Fig. 1a). However, both  
82 markers of junctional RhoA were reduced ~ 50% in anillin KD cells, but restored with  
83 anillin<sup>WT</sup> (Fig. 1 d,e; Extended Data Fig. 1c,d). We confirmed that anillin was required for  
84 junctional RhoA, by developing two additional location biosensors based on the GTP-  
85 RhoA binding domains (GBDs) of mDia1 (mDia1-GBD) and ROCK1 (ROCK1-GBD).  
86 Both sensors localized to the ZA in a RhoA-sensitive fashion and were reduced by anillin  
87 KD (Extended Data Fig. 2 j-n). Strikingly, although junctional RhoA was reduced in cells  
88 expressing anillin<sup>ΔMyo</sup> or anillin<sup>ΔAH</sup>, only the ΔAH mutant had a persistent effect after  
89 correction for junctional recruitment (Fig. 1g; Extended Fig. 3 a,b). This strongly implied  
90 that the anillin AH domain supports junctional contractility via RhoA.

91 Although the AH domain can interact with Ect2<sup>5</sup>, which activates RhoA at the  
92 ZA<sup>11</sup>, junctional Ect2 was not altered by anillin KD (Extended Data Fig. 3 c,d). Nor did  
93 anillin KD affect output from a FRET-based RhoA activity sensor (Extended Data Fig. 3  
94 e), as might have been expected if anillin were regulating the balance of GEFs and  
95 GAPs that acted upon junctional RhoA. We therefore hypothesized that direct binding by  
96 its AH domain might allow anillin to stabilize GTP-RhoA at the junctional membrane.  
97 Indeed, FRAP experiments showed that anillin KD destabilized GFP-RhoA at the ZA, as  
98 well as RhoA<sup>Q63L</sup>, a GTPase-defective mutant (Extended Data Fig. 3 f,g; Fig. 1h,i), which

99 excluded the possibility that anillin was regulating RhoA dynamics indirectly through  
100 changes in the kinetics of its activation and inactivation<sup>13</sup>. This was confirmed by  
101 analysis of fluorescence decay after photoactivating RhoA<sup>Q63L</sup> tagged with  
102 photoactivatable (PA)-GFP (Fig. 1j; Extended Data Fig. 3h). Anillin KD increased the  
103 apparent dissociation rate (K<sub>off</sub>) of PA-GFP-RhoA<sup>Q63L</sup>, calculated from the initial rate of  
104 fluorescence decay (Fig. 1k). Kymographs showed little lateral diffusion either in control  
105 or anillin KD cells (Fig. 1l), implying that fluorescence decay principally reflected the  
106 dissociation of GTP-RhoA from the plasma membrane.

107 Together, these findings suggested that anillin might regulate RhoA at the ZA by  
108 direct binding, rather than through the canonical regulation of its nucleotide-bound  
109 status<sup>14</sup>. Indeed, mutating two residues in the AH domain (A740D/E758K) that are  
110 required for GTP-RhoA binding<sup>10</sup>, ablated the ability of anillin to support junctional RhoA  
111 (Fig. 1g; Extended Data Fig. 3a,b) or stabilize either GFP-RhoA or GFP-RhoA<sup>Q63L</sup>  
112 (Extended Data Fig. 3 f,g; Fig. 1 h,i). Since anillin has been implicated in cell division<sup>9</sup>,  
113 we asked if RhoA stabilization also pertained during cytokinesis. Anillin KD destabilized  
114 GFP-RhoA<sup>Q63L</sup> in both FRAP (Fig. 1m; Extended Data Fig.3i) and photoactivation (Fig.  
115 1n; Extended Data Fig.3 j,k) experiments and stability was restored by anillin<sup>WT</sup> but not  
116 by anillin<sup>A740D/E758K</sup>.

117 We then targeted the AH domain to specific cortical sites in anillin KD cells to test  
118 how RhoA scaffolding contributed to anillin-dependent contractility. For the ZA, we fused  
119 AH to the N-terminus of  $\alpha$ -catenin (AH- $\alpha$ -catenin) (Fig.2a; Extended Data Fig. 4a-c),  
120 using full-length  $\alpha$ -catenin to avoid potential dominant-negative effects of  $\alpha$ -catenin  
121 fragments; and for the cytokinetic furrow we used a previously-reported MRLC-AH fusion  
122<sup>10</sup>. For comparison, we also targeted the high-affinity RhoA-binding domain of Rhotekin  
123 (rGBD). Binding of GTP-RhoA by the AH domain was sufficient to support RhoA activity  
124 to the ZA, being restored by AH- $\alpha$ -catenin but not by AH<sup>A740D/E758K</sup>- $\alpha$ -catenin (Fig. 2 b,c;  
125 Extended Data Fig. 4 c,d). Strikingly, AH- $\alpha$ -catenin also restored junctional levels of  
126 contractile effectors (Fig. 2 b,d; Extended Data Fig. 4c,e) and junctional tension itself  
127 (Fig.2e; Extended Data Fig. 4 f,g) to control levels. But this did not occur with  
128 AH<sup>A740D/E758K</sup>- $\alpha$ -catenin. Similarly, MRLC-AH, but not MRLC-AH<sup>A740D/E758K</sup>, largely  
129 restored the cytokinetic defects of anillin KD cells (Fig. 2f). In contrast, targeting the  
130 rGBD did not restore contractility to the ZA (Fig.2e; Extended Data Fig. 4 f), despite  
131 stabilizing RhoA as effectively as did AH- $\alpha$ -catenin (Extended Fig. 5 f-i). Nor was

132 cytokinesis restored by an MRLC-rGBD fusion protein (Fig. 2f). The anillin AH domain  
133 alone was therefore sufficient to scaffold RhoA-dependent cell contractility at both the ZA  
134 and cytokinetic furrow, ruling out traditional multi-domain tether mechanisms.

135 Together, these findings present an apparent contradiction, since biochemical  
136 and structural studies have demonstrated that anillin binds to the same surface of GTP-  
137 RhoA as do effector proteins<sup>10,15,16</sup>. Therefore, how could binding by anillin stabilise  
138 GTP-RhoA without sequestering it away from effectors and inhibiting signaling?

139 To explain this, we make contact with the notion of stochastic resetting<sup>17,18</sup>, and  
140 propose that repeated, transient binding to anillin can increase the amount of time each  
141 GTP-RhoA molecule spends in its free (*i.e.*, non-anillin or -effector bound) state. This is  
142 only possible if, after unbinding from anillin, the inactivation rate of RhoA increases with  
143 time (a so-called non-Poisson process). Here, inactivation can then be thought of as  
144 being monitored by a stop-clock. The probability of inactivation (per unit time) increases  
145 with time unless there is an interruption, whereby the clock is reset. Transient binding of  
146 anillin constitutes precisely such an interruption, so that cycles of binding/unbinding  
147 repeatedly reset the inactivation “clock”, increasing the cortical residence time of free  
148 GTP-RhoA and hence the number of effector interactions. Importantly, this approach  
149 predicts that levels of RhoA-mediated contractile signalling can be tuned by modulating  
150 the local concentration of anillin, even if the level of RhoA is unchanged (Theoretical  
151 Supplement Fig. 1 a-g).

152 We developed a minimal cellular system to test our theory, by substituting AH for  
153 the cytoplasmic domain of the interleukin-2 receptor  $\alpha$ -subunit (Tac, IL2R-AH; Fig. 3a).  
154 IL2R-AH was expressed in single MCF-7 cells along with a uniform amount of RhoA<sup>Q63L</sup>  
155 mRNA, and the chimeric anillin construct concentrated into cortical patches by applying  
156 beads coated with  $\alpha$ -Tac mAb (Fig. 3 a,b). As expected, IL2R-AH co-accumulated  
157 RhoA<sup>Q63L</sup> in the cortical patches, but not if its ability to bind GTP-RhoA was ablated  
158 (IL2R-AH<sup>A740D/E758K</sup>, concentrated to a similar degree as IL2R-AH; Fig. 3 b,c; Extended  
159 data Fig. 5a). Furthermore, mDia1 co-accumulated in IL2R-AH, but not IL2R-  
160 AH<sup>A740D/E758K</sup>, patches (Fig. 3 d,e). Effector recruitment was confirmed using the ROCK1-  
161 GBD (Extended Data Fig. 5 b,c) and mDia1-GBD probes (Extended Data Fig. 5d), which  
162 presumably were responding to the presence of cortical GTP-RhoA, as they lack other  
163 protein-interaction domains. We then modulated the cortical concentration of IL2R-AH in  
164 the patches by coating the beads with different concentrations of  $\alpha$ -Tac. FRAP

165 experiments revealed that IL2R-AH stabilized GFP-RhoA<sup>Q63L</sup> and the degree of  
166 stabilization increased with the density of IL2R-AH (Fig. 3f; Extended Fig. 5e). Strikingly,  
167 we found that the cortical recruitment of the effector mDia1 also increased with the  
168 amount of IL2R-AH (Fig. 3g), confirming the expectations of our resetting model.

169 Importantly, time-dependent rates (and their associated waiting-time  
170 distributions) typically arise from intermediate steps and cycles, as exemplified by the  
171 celebrated Hopfield-Ninio model of kinetic proofreading<sup>19-21</sup>. This implied that anillin  
172 might affect some intermediate step in the process of RhoA inactivation. Given that  
173 anillin antagonized the dissociation of RhoA<sup>Q63L</sup>, we considered properties of the  
174 membrane that might influence this process. Notably, the AH domain has an atypical  
175 lipid-binding C2 motif<sup>10</sup> and IL2R-AH clusters accumulated phosphoinositide 4,5-P<sub>2</sub>  
176 (PIP<sub>2</sub>) (Fig. 3h,i). As acidic phospholipids can antagonize RhoA dissociation both directly  
177<sup>22</sup> and indirectly<sup>23</sup>, we hypothesized that binding of anillin might facilitate the interaction  
178 of GTP-RhoA with a membrane environment that favoured its cortical retention. Indeed,  
179 blocking PIP<sub>2</sub> access with neomycin significantly reduced the recruitment of RhoA  
180 effectors (tested using mDia1-GBD to eliminate potential contributions from the  
181 phospholipid-binding domain of mDia1) (Fig. 3j). Moreover, using a revised, fully  
182 Poissonian reaction scheme that explicitly incorporates the role of PIP<sub>2</sub> as an inhibitor of  
183 membrane dissociation we predict that the level of effector recruitment is directly  
184 proportional to the level of anillin present at the membrane (Theoretical Supplement Fig.  
185 1 h-k). This is consistent with our experimental findings (Fig. 3g), and supports the idea  
186 that antagonism of RhoA dissociation by concentrating membrane lipids may be  
187 instrumental for the AH domain to regulate GTP-RhoA signaling.

188 Finally, we sought the mechanism that controlled the cortical density of anillin,  
189 which our model predicted would determine how much it influenced RhoA signaling.  
190 Here, we noted that, although anillin is sensitive to RhoA (Fig. 4a,d), its junctional  
191 recruitment was most impaired when its NMII-binding domain was deleted (Extended  
192 Data Fig. 2 b,c). As NMII concentrates at sites where anillin is found, we postulated that  
193 NMII might constitute an additional cortical anchor for anillin. In support of this, the  
194 myosin inhibitor, blebbistatin, reduced junctional anillin (Extended Data Fig. 6a,b) and  
195 the stability of anillin in FRAP experiments was compromised when NMII-binding, but not  
196 F-actin binding, was disrupted (Extended Data Fig. 2 d,e). However, it was possible that

197 these effects were indirect, because junctional RhoA signaling is compromised when  
198 NMII is blocked<sup>12,24</sup>.

199 Therefore, we developed a strategy to test if NMII can recruit anillin to junctions  
200 independently of RhoA. For this, we expressed a phosphomimetic transgene of MRLC  
201 (T18D/S19D; MRLC<sup>DD</sup>) that stabilized junctional GFP-NMIIA compared with a wild-type  
202 transgene (MRLC<sup>WT</sup>; Extended Data Fig. 6 c,d). Endogenous NMIIA persisted with  
203 MRLC<sup>DD</sup> at junctions when RhoA was blocked with C3T (confirmed by loss of TCA-  
204 resistant RhoA staining; Fig. 4 a-c; Extended Data Fig. 6 f,g). In contrast, C3T displaced  
205 NMIIA from junctions in cells expressing MRLC<sup>WT</sup> (Fig. 4 a-c). Thus, MRLC<sup>DD</sup> could  
206 stabilize junctional NMII even when RhoA was inhibited. Importantly, MRLC<sup>DD</sup> increased  
207 junctional anillin even in the presence of C3T (Fig. 4a,d; Extended Data Fig. 6 e),  
208 whereas junctional anillin was depleted in cells expressing MRLC<sup>WT</sup> when RhoA was  
209 blocked. Thus, NMII could anchor and control the junctional concentration of anillin  
210 independently of RhoA.

211 Then we asked if stabilizing NMII modulated RhoA signaling via anillin. Indeed,  
212 MRLC<sup>DD</sup> increased active RhoA at the ZA (Fig. 4 e,f; Extended Fig. 6 h,i) and increased  
213 the immobile fraction of GFP-RhoA<sup>Q63L</sup> in FRAP experiments (Extended Data Fig. 6 j,k).  
214 This was accompanied by increased levels of the contractile effectors, ROCK1 and  
215 mDia1, and increased junctional tension (Fig. 4 e,g,h; Extended Data Fig.6 h, l-n). Anillin  
216 was necessary for these effects, as they did not occur in anillin KD cells, implying that  
217 MRLC<sup>DD</sup> did not promote junctional contractility by a direct effect on NMII motor activity  
218 or via other pathways that can modulate RhoA<sup>12</sup>. Furthermore, as predicted by our  
219 model, binding of RhoA by anillin was necessary for MRLC<sup>DD</sup> to increase GTP-RhoA and  
220 contractility, as these effects did not occur in anillin KD cells reconstituted with  
221 anillin<sup>A740D/E758K</sup>. Nor were they restored if anillin was unable to bind NMII (anillin<sup>ΔMyo</sup>).

222 In conclusion, we propose that anillin functions as an NMII-anchored scaffold that  
223 promotes RhoA-dependent contractility by kinetic resetting (Fig 4i). In this model, cycles  
224 of unbinding and re-binding can increase the residence time of free, GTP-RhoA at the  
225 cortex, thus increasing its probability of engaging with effectors. For this, the process of  
226 RhoA inactivation must be non-Poissonian, implying that it includes some intermediate  
227 stage(s) that could be interrupted by anillin. Currently, our data with a GTP-locked RhoA  
228 suggest that one such intermediate factor is the content of acidic phospholipids in the

229 local membrane environment that can antagonize RhoA dissociation<sup>22,23</sup>. We postulate  
230 that anillin localizes PIP<sub>2</sub>, so that binding between anillin and GTP-RhoA increases the  
231 probability of interaction between PIP<sub>2</sub> and GTP-RhoA. On unbinding from anillin, this  
232 lipid association facilitates membrane retention of GTP-RhoA, with the probability of  
233 cortical dissociation increasing with time (an inactivation “clock”). Cycles of binding / un-  
234 binding of anillin to GTP-RhoA may then repeatedly reset the clock, implying that the  
235 concentration of anillin can be used to tune the residence time of free GTP-RhoA, and  
236 hence interaction with effectors. Scaffolding by resetting can therefore be seen to be a  
237 regulatory analogue of kinetic proof-reading. In proofreading, a binding affinity, or time  
238 to unbinding, is encoded as a concentration. Here, the reverse is true: changing a  
239 concentration modifies a residence time (and hence effector engagement).

240 In this context, anchoring anillin by NMII might represent a post-activation  
241 mechanism to modulate contractile signaling that is orthogonal to the classical pathways  
242 that regulate RhoA signaling. Indeed, we found that stabilization of NMII enhanced  
243 junctional RhoA signaling via anillin, identifying both anillin and ROCK1<sup>12</sup> as part of a  
244 feedback network that allows NMII to positively regulate RhoA signaling, its upstream  
245 regulator. Such positive feedback may account for the stable patterns of contractility  
246 found when epithelia assemble mature zonulae adherente<sup>11,12,24</sup>, the exact adhesive  
247 zones where stable RhoA signaling coincides with the highest level of contractile  
248 tension.

249 More generally, scaffolding by repeated, transient binding may present an  
250 alternative paradigm for molecules that do not conform to the classical model of multi-  
251 domain tethering. Potentially this may apply to other GTPases as well as other signals  
252 whose functional outcomes depend on their dwell time in the active state.

253

254

## 255 **Acknowledgements**

256

257 We thank our lab colleagues for much support and advice during the course of this work.  
258 This work was supported by grants (1037320, 1067405) and fellowships (1044041 [ASY])  
259 from the National Health and Medical Research Council of Australia, Australian  
260 Research Council (DP150101367, FT160100366 [GAG]), Queensland Cancer Council  
261 grants 1086857, 1128123), the Simons Foundation [RGM] and Human Frontiers Science



262 Program grant RGP0023/2014). Optical microscopy was performed at the ACRF/IMB  
263 Cancer Biology Imaging Facility, established with the generous support of the Australian  
264 Cancer Research Foundation.

265

#### 266 **Author contributions.**

267 SB and ASY conceived the project with conceptual and analytical input from GAG and  
268 NAH; SB designed and performed the experiments with technical assistance of MN and  
269 SV for cloning and western blotting respectively; S.B analysed the data. KBH and RGM  
270 developed the theory; and SB, KBH, RGM and ASY wrote the paper.

271

#### 272 **References**

- 273 1 Good, M. C., Zalatan, J. G. & Lim, W. A. Scaffold proteins: hubs for controlling  
274 the flow of cellular information. *Science* **332**, 680-686,  
275 doi:10.1126/science.1198701 (2011).
- 276 2 Langeberg, L. K. & Scott, J. D. Signalling scaffolds and local organization of  
277 cellular behaviour. *Nat Rev Mol Cell Biol* **16**, 232-244, doi:10.1038/nrm3966  
278 (2015).
- 279 3 Bement, W. M., Miller, A. L. & von Dassow, G. Rho GTPase activity zones and  
280 transient contractile arrays. *Bioessays* **28**, 983-993 (2006).
- 281 4 Field, C. M. & Alberts, B. M. Anillin, a contractile ring protein that cycles from the  
282 nucleus to the cell cortex. *J Cell Biol* **131**, 165-178 (1995).
- 283 5 Piekny, A. J. & Maddox, A. S. The myriad roles of Anillin during cytokinesis.  
284 *Seminars in cell & developmental biology* **21**, 881-891,  
285 doi:10.1016/j.semcdb.2010.08.002 (2010).
- 286 6 Reyes, C. C. *et al.* Anillin regulates cell-cell junction integrity by organizing  
287 junctional accumulation of Rho-GTP and actomyosin. *Curr Biol* **24**, 1263-1270,  
288 doi:10.1016/j.cub.2014.04.021 (2014).
- 289 7 Guo, Z. *et al.* E-cadherin interactome complexity and robustness resolved by  
290 quantitative proteomics. *Sci Signal* **7**, rs7, doi:10.1126/scisignal.2005473 (2014).
- 291 8 Straight, A. F., Field, C. M. & Mitchison, T. J. Anillin binds nonmuscle myosin II  
292 and regulates the contractile ring. *Mol Biol Cell* **16**, 193-201,  
293 doi:10.1091/mbc.E04-08-0758 (2005).
- 294 9 Piekny, A. J. & Glotzer, M. Anillin is a scaffold protein that links RhoA, actin, and  
295 myosin during cytokinesis. *Curr Biol* **18**, 30-36, doi:S0960-9822(07)02414-1 [pii]  
296 10.1016/j.cub.2007.11.068 (2008).
- 297 10 Sun, L. *et al.* Mechanistic insights into the anchorage of the contractile ring by  
298 anillin and Mid1. *Dev Cell* **33**, 413-426, doi:10.1016/j.devcel.2015.03.003 (2015).
- 299 11 Ratheesh, A. *et al.* Centralspindlin and alpha-catenin regulate Rho signalling at  
300 the epithelial zonula adherens. *Nat Cell Biol* **14**, 818-828, doi:10.1038/ncb2532  
301 (2012).
- 302 12 Priya, R. *et al.* Feedback regulation through myosin II confers robustness on  
303 RhoA signalling at E-cadherin junctions. *Nat Cell Biol* **17**, 1282-1293,  
304 doi:10.1038/ncb3239 (2015).

- 305 13 Moissoglu, K., Slepchenko, B. M., Meller, N., Horwitz, A. F. & Schwartz, M. A. In  
306 vivo dynamics of Rac-membrane interactions. *Mol Biol Cell* **17**, 2770-2779,  
307 doi:10.1091/mbc.E06-01-0005 (2006).
- 308 14 Jaffe, A. B. & Hall, A. Rho GTPases: biochemistry and biology. *Annu Rev Cell*  
309 *Dev Biol* **21**, 247-269, doi:10.1146/annurev.cellbio.21.020604.150721 (2005).
- 310 15 Dvorsky, R. & Ahmadian, M. R. Always look on the bright site of Rho: structural  
311 implications for a conserved intermolecular interface. *EMBO Rep* **5**, 1130-1136,  
312 doi:10.1038/sj.embor.7400293 (2004).
- 313 16 Jaiswal, M., Fansa, E. K., Dvorsky, R. & Ahmadian, M. R. New insight into the  
314 molecular switch mechanism of human Rho family proteins: shifting a paradigm.  
315 *Biol Chem* **394**, 89-95, doi:10.1515/hsz-2012-0207 (2013).
- 316 17 Reuveni, S., Urbakh, M. & Klafter, J. Role of substrate unbinding in Michaelis-  
317 Menten enzymatic reactions. *Proc Natl Acad Sci U S A* **111**, 4391-4396,  
318 doi:10.1073/pnas.1318122111 (2014).
- 319 18 Roldan, E., Lisica, A., Sanchez-Taltavull, D. & Grill, S. W. Stochastic resetting in  
320 backtrack recovery by RNA polymerases. *Phys Rev E* **93**, 062411,  
321 doi:10.1103/PhysRevE.93.062411 (2016).
- 322 19 Hopfield, J. J. Kinetic proofreading: a new mechanism for reducing errors in  
323 biosynthetic processes requiring high specificity. *Proc Natl Acad Sci U S A* **71**,  
324 4135-4139 (1974).
- 325 20 Ninio, J. Kinetic amplification of enzyme discrimination. *Biochimie* **57**, 587-595  
326 (1975).
- 327 21 Murugan, A., Huse, D. A. & Leibler, S. Speed, dissipation, and error in kinetic  
328 proofreading. *Proc Natl Acad Sci U S A* **109**, 12034-12039,  
329 doi:10.1073/pnas.1119911109 (2012).
- 330 22 Yoshida, S., Bartolini, S. & Pellman, D. Mechanisms for concentrating Rho1  
331 during cytokinesis. *Genes Dev* **23**, 810-823, doi:10.1101/gad.1785209 (2009).
- 332 23 Faure, J., Vignais, P. V. & Dagher, M. C. Phosphoinositide-dependent activation  
333 of Rho A involves partial opening of the RhoA/Rho-GDI complex. *Eur J Biochem*  
334 **262**, 879-889 (1999).
- 335 24 Priya, R. *et al.* Bistable front dynamics in a contractile medium: Travelling wave  
336 fronts and cortical advection define stable zones of RhoA signaling at epithelial  
337 adherens junctions. *PLoS Comput Biol* **13**, e1005411,  
338 doi:10.1371/journal.pcbi.1005411 (2017).
- 339

340

341

342

343

## 344 **Figure Legends**

345

### 346 **Figure 1. Anillin binds and stabilizes active RhoA at sites of contractility**

347

348 **(a)** Co-localization of endogenous anillin with E-Cadherin; XZ views, taken at the  
349 indicated lines, show apical accumulation of anillin with E-cadherin.

350 **(b,c)** Recoil measurements **(b)** and initial recoil velocity **(c)** of cell junctions after laser  
351 ablation of junctions.

352 **(d,e)** Immunostaining **(d)** and fluorescence intensity **(e)** of junctional AHPH in MCF-7  
353 cells expressing control shRNA, Anillin shRNA (KD), or Anillin shRNA reconstituted with  
354 full-length RNAi resistant Cherry-anillin (Anillin<sup>WT</sup>).

355 **(f)** Domain structure of full-length (FL) anillin and the various mutant transgenes used in  
356 this study.

357 **(g)** Fluorescence intensity of GFP-AHPH at ZA in anillin shRNA MCF-7 cells normalized  
358 to the expression levels of the reconstituted anillin transgenes.  $FL^{DM} = FL^{A740D,E758K}$

359 **(h,i)** FRAP of GFP-RhoAQ63L at the ZA in Anillin KD or reconstituted cells: best-fit  
360 curves **(h)**, immobile fractions **(i)**.

361 **(j-l)** Fluorescence decay **(j)**, initial Koff **(k)**, and kymograph **(l)** of photoactivated  
362 RhoAQ63L (PA-RhoAQ63L) at ZA in control or Anillin shRNA MCF-7 cells.

363 **(m)** FRAP of GFP-RhoAQ63L at the cytokinetic furrow in Anillin KD or reconstituted  
364 cells; immobile fractions from best-fit curves.

365 **(n)** Initial Koff of of photoactivated RhoAQ63L (PA-RhoAQ63L) at the cytokinetic furrow  
366 in control or Anillin shRNA MCF-7 cells.

367 Data represent means  $\pm$  s.e.m and  $n = 3$  independent experiments except for **(m)** and  
368 **(n)** where data represents  $\pm$  s.d and  $n \leq 11$  cells. \*\*  $P < 0.01$ , \*\*\* $P < 0.001$ , \*\*\*\* $P <$   
369  $0.0001$ ; ns, not significant; One-way ANOVA with Dunnett's multiple comparisons test  
370 **(c,e,g,i,m)**; Students  $t$ -test **(k,n)**. Scale bars,  $10 \mu m$ ;  $5 \mu m$  for XZ views.

371

### 372 **Figure 2. The anillin AH domain is sufficient to support junctional contractility.**

373 **(a)** Cartoon depicting the GFP-AH- $\alpha$ -catenin chimeric construct.

374 **(b,c)** Representative images **(b)** and fluorescence intensity of GFP-AHPH **(c)** and NMIIA  
375 **(d)** at ZA of cells expressing control siRNA, Anillin siRNA (KD) and Anillin siRNA along  
376 with the indicated  $\alpha$ -catenin chimeras (AH, AH<sup>DM</sup> and rGBD). Asterisks indicate cells  
377 expressing the transgene.

378 **(e)** Junctional tension (initial recoil velocity) in cells expressing the indicated siRNA and  
379 transgenes.

380 **(f)** Quantification of cytokinetic defects (bi-nucleation) in MCF-7 cells expressing control  
381 siRNA, anillin siRNA (KD) and anillin siRNA along with the indicated MRLC chimeras (-  
382 AH, -AH<sup>DM</sup> and -rGBD).

383 Data represent means  $\pm$  s.e.m and n = 3 independent. \*P < 0.05, \*\* P < 0.01, \*\*\*P <  
384 0.001, \*\*\*\*P < 0.0001; ns, not significant; One-way ANOVA with Dunnett's multiple  
385 comparisons test. Scale bars, 10  $\mu$ m.

386

387 **Figure 3. A non-tether kinetic model for scaffolding GTP-Rho by anillin.**

388 **(a)** Cartoon depicting the IL2-AH chimeric constructs and assay to co-cluster AH and  
389 RhoA on the cortex.

390 **(b,c)** Clustering IL2-AH and RhoAQ63L with anti-tac beads. Representative heat map  
391 images (XZ views) of isolated MCF-7 cells co-expressing GFP-RhoAQ63L with either  
392 IL2-AH-Cherry or IL2-AH<sup>A740D,E758K</sup>-Cherry (AH<sup>DM</sup>) and overlaid with latex beads coated  
393 with anti-Tac or control mouse IgG. Arrows indicate the position of the latex bead on the  
394 cortex **(b)**. Fluorescence intensity (FI) of cortical GFP-RhoA Q63L accumulated under  
395 beads (normalized to signal at the free cortex) **(c)**.

396 **(d,e)** Effect of clustering AH and rGBD domains on the recruitment of endogenous  
397 mDia1. Representative heat map images (XZ views) **(d)** and fluorescence intensity of  
398 mDia1 accumulated under beads (normalized to signal at the free cortex) **(e)**.

399 **(f,g)** Effect of clustering density of IL2R-AH on cortical stability of GFP-RhoA Q63L and  
400 recruitment of endogenous mDia1; immobile fractions from best-fit FRAP profiles **(f)**;  
401 Fluorescence intensity of mDia1 and IL2-AH accumulated under beads (normalized to  
402 signal at the free cortex) with varied anti-tac coating **(g)**.

403 **(h-j)** Effect of clustering AH on cortical accumulation of membrane phospholipids (PIPs);  
404 Representative XZ images **(h)** and fluorescence intensity of PLC $\delta$ PH (as a proxy for

405 phosphatidylinositol 4,5 bisphosphate) (i) and GFP-mDia-GBD (j) underbeads coated  
406 with anti-tac and treated with neomycin.

407 Data represent means  $\pm$  s.e.m and  $n = 3$  independent experiments. \* $P < 0.05$ , \*\*  $P <$   
408  $0.01$ , \*\*\* $P < 0.001$ , \*\*\*\* $P < 0.0001$ ; ns, not significant; One-way ANOVA with Dunnett's  
409 multiple comparisons test (c,e) or Tukey's multiple comparisons test (f,g,i,j); Scale bars,  
410  $5 \mu\text{m}$ .

411

412 **Figure 4. Cortical anchorage of anillin by Myosin II regulates RhoA signaling.**

413 (a-d) Myosin dependent localization of anillin; Representative images (a) and  
414 fluorescence intensity of cherry-MRLC (b), NMIIa (c) and anillin (d) at the ZA of cells  
415 expressing MRLC-WT or MRLC-DD and treated with C3 transferase (C3T).

416 (e-g) Stabilized Myosin promotes RhoA signaling at ZA through anillin; Representative  
417 images (e) and quantified fluorescence intensity of AHPH (f) and ROCK1 (g) at the ZA of  
418 cells expressing MRLC-WT or co-expressing MRLC-DD with anillin shRNA (KD) or  
419 reconstituted anillin transgenes. Asterisks denote cells expressing the indicated  
420 transgene. Arrows indicate the homologous junctions that are quantified.

421 (h) Junctional tension (initial recoil velocity) in cells expressing the indicated siRNA and  
422 transgenes.

423 (i) Cartoon illustrating GTP-RhoA scaffolding by anillin. Free GTP-RhoA on membrane  
424 is able to interact with contractile effectors (mDia1 and ROCK1) so long as it does not  
425 undergo inactivation / cortical dissociation (whose rate is  $k_D$ ). Binding to Anillin blocks  
426 both inactivation and engagement with effectors. On un-binding, GTP-RhoA is again  
427 free to interact with effectors, however the rate of inactivation is now lowered, recovering  
428 to  $k_D$  with time. At sufficiently high density of anillin, repeated cycles of binding /  
429 unbinding can increase the residence time of free GTP-RhoA and hence interaction with  
430 effectors, until eventually the GTP-RhoA is inactivated. The cortical NMII network  
431 stabilizes and generates high density of anillin at the cortex which then provides a  
432 pathway for mechanochemical feedback from NMII to RhoA.

433 Data represent means  $\pm$  s.e.m and  $n = 3$  independent experiments. \* $P < 0.05$ , \*\*  $P <$   
434  $0.01$ , \*\*\* $P < 0.001$ , \*\*\*\* $P < 0.0001$ ; ns, not significant; One-way ANOVA with Tukey's  
435 multiple comparisons test; Scale bars,  $10 \mu\text{m}$ .

436

437 **EXTENDED DATA FIGURE LEGENDS**

438

439 **Extended Data Figure 1: Related to Figure 1: Anillin binds and stabilizes active**  
440 **RhoA at sites of contractility**

441 (a) Co-localization of endogenous anillin with NMIIA, F-actin, AHPH and TCA-RhoA. XZ  
442 views, taken at the indicated lines, show apical accumulation of anillin with NMIIA, F-  
443 actin, AHPH and TCA-RhoA.

444 (b) Analysis of viscous drag from recoil measurements after laser ablation. The rate  
445 constant, k-value, for each junction was obtained after fitting the vertex displacement  
446 values to a mono exponential curve. To assess the influence of viscous drag on the  
447 initial recoil values used for tension measurements, the average k-values over several  
448 experiments were analysed for each condition.

449 (c-h) Immunostaining of junctional proteins in MCF-7 cells expressing control shRNA,  
450 Anillin shRNA (KD), or Anillin shRNA reconstituted with full-length RNAi resistant Cherry-  
451 anillin). Representative images (c) and fluorescence intensity of junctional TCA-resistant  
452 RhoA (d), F-actin (e), NMIIA (f), ROCK1 (g) and mDia1 (h) at the ZA. Asterisks denote  
453 the cells expressing the indicated shRNA or transgene. Arrows indicate the homologous  
454 junctions that are quantified.

455 (i) Immunoblot of anillin, NMIIA, actin, RhoA, ROCK1 and mDia1 in MCF-7 cells  
456 expressing control siRNA or anillin siRNA (KD). GAPDH and  $\beta$ -tubulin were loading  
457 controls.

458 Data represent means  $\pm$  s.e.m and n = 3 independent experiments. \*\* P < 0.01, \*\*\*P <  
459 0.001; \*\*\*\*P < 0.0001; ns, not significant; One-way ANOVA with Dunnett's multiple  
460 comparisons test. Scale bars, 10  $\mu$ m; 5  $\mu$ m for XZ views.

461

462 **Extended Data Figure 2: Related to Figure 1: Anillin binds and stabilizes active**  
463 **RhoA at sites of contractility**

464 (a) Immunoblot of anillin in cells expressing anillin shRNA (KD) along with indicated  
465 RNAi resistant anillin transgenes. GAPDH served as loading control.

466 (b,c) Representative images (b) and Junctional localization of full-length (FL) anillin and  
467 mutant transgenes normalized to expression levels (Junctional/cytoplasmic fluorescence  
468 intensity ratios) (c).

469 **(d,e)** FRAP of anillin transgenes at the ZA; Best fit curves **(d)** and immobile fractions **(e)**.  
470 **(f,g)** Junctional NMIIA levels in cells expressing anillin transgenes; Representative  
471 images **(f)** and fluorescence intensity of NMIIA normalized to junctional levels of anillin  
472 transgene **(g)**. Asterisks denote cells expressing the indicated transgene.  
473 **(h,i)** Representative images **(h)** and fluorescence intensity of junctional anillin full-length  
474 transgene in cells expressing Cherry-AHPH **(i)**.  
475 **(j-n)** Junctional localization of GFP tagged GTPase Binding Domain (GBD) of ROCK1 or  
476 mDia1. Representative images **(j)** and quantified junctional intensity of ROCK1-GBD and  
477 mDia1-GBD at ZA of cells treated with C3 transferase (1 $\mu$ g/ml) **(k,l)** or expressing anillin  
478 shRNA (KD) or reconstituted full-length anillin **(m,n)**. Asterisks indicate cells expressing  
479 the transgene.  
480 Data represent means  $\pm$  s.e.m and n = 3 independent experiments. \*P < 0.05, \*\* P <  
481 0.01, \*\*\*P < 0.001; ns, not significant; Student's *t*-test **(i,k,l)**, One-way ANOVA with  
482 Dunnett's multiple comparisons test **(c,e,g,m,n)**. Scale bars, 10  $\mu$  m.

483

484 **Extended Data Figure 3: Related to Figure 1: Anillin binds and stabilizes active**  
485 **RhoA at sites of contractility**

486 **(a-b)** Representative images of AHPH and TCA-RhoA **(a)** and fluorescence intensity of  
487 TCA-RhoA normalized to junctional levels of anillin transgene **(b)** at the ZA of cells  
488 reconstituted with anillin transgenes.

489 **(c,d)** Immunostaining of Ect2 in cells depleted of Anillin (KD). Representative images **(c)**  
490 and fluorescence intensity at ZA **(d)**.

491 **(e)** RhoA FRET biosensor emission ratios measured at ZA in cells expressing control or  
492 Anillin siRNA.

493 **(f,g)** FRAP of GFP-RhoA at the ZA in Anillin KD or reconstituted cells: best-fit curves **(f)**  
494 and immobile fractions **(g)**.

495 **(h)** Immobile fraction of photoactivated RhoAQ63L (PA-RhoAQ63L) at ZA in control or  
496 Anillin shRNA MCF-7 cells.

497 **(i)** Best-fit curves of FRAP of GFP-RhoAQ63L at the cytokinetic furrow of Anillin KD or  
498 reconstituted cells.

499 **(j,k)** Fluorescence decay **(j)** and immobile fraction **(k)** of photoactivated RhoAQ63L (PA-  
500 RhoAQ63L) at the cytokinetic furrow of control or Anillin shRNA MCF-7 cells.

501 Data represent means  $\pm$  s.e.m and  $n = 3$  independent experiments except for **(k)** where  
502 data is means  $\pm$  s.d. and  $n \leq 11$  cells. \*\*  $P < 0.01$ , \*\*\* $P < 0.001$ , \*\*\*\* $P < 0.0001$ ; ns, not  
503 significant; Student's *t*-test (**d,e,h,k**), One-way ANOVA with Dunnett's multiple  
504 comparisons test (**b,g**). Scale bars, 10  $\mu$  m.

505

506 **Extended Data Figure 4: Related to Figure 2: The anillin AH domain is sufficient to**  
507 **support junctional contractility.**

508 **(a)** Immunoblot of GFP in cells expressing GFP tagged  $\alpha$ -catenin chimeras.

509 **(b-e)** GFP tagged  $\alpha$ -catenin chimeras in MCF-7 cells. Fluorescence intensity of  $\alpha$ -  
510 catenin chimeras normalized to cytoplasmic signal **(b)**. Representative images of  
511 transgenes, E-cadherin, TCA-RhoA and ROCK1 **(c)** and fluorescence intensity of TCA-  
512 RhoA **(d)** and ROCK1 **(e)** at the ZA. Asterisks indicate cells expressing the chimeric  
513 transgenes.

514 **(f,g)** Junctional tension in cells expressing the indicated siRNA and transgene. Recoil  
515 measurements of cell junctions after laser ablation **(f)**. Analysis of viscous drag from  
516 recoil measurements after laser ablation **(g)**.

517 Data represent means  $\pm$  s.e.m and  $n = 3$  independent experiments. \* $P < 0.05$ , \*\*\* $P <$   
518  $0.001$ , \*\*\*\* $P < 0.0001$ ; ns, not significant; One-way ANOVA with Dunnett's multiple  
519 comparisons test. Scale bars, 10  $\mu$ m.

520

521 **Extended Data Figure 5: Related to Figure 3: A non-tether kinetic model for**  
522 **scaffolding GTP-Rho by anillin.**

523 **(a)** Clustering IL2 with anti-tac beads. Fluorescence intensity (FI) of cortical IL2 (-AH or -  
524 AH<sup>DM</sup>) accumulated under beads (normalized to signal at the free cortex).

525 **(b-d)** Effect of clustering AH, AH<sup>DM</sup> and rGBD domains on the recruitment of GFP-  
526 ROCK1-GBD and GFP-mDia1-GBD. Representative heat map images (XZ views) of  
527 ROCK1-GBD **(b)** and fluorescence intensity of ROCK1-GBD **(c)** and mDia1-GBD **(d)**  
528 accumulated under beads (normalized to signal at the free cortex).

529 **(e)** Effect of clustering density of IL2R-AH on cortical stability of GFP-RhoA Q63L; best-  
530 fit FRAP profiles.

531 **(f-i)** Clustering AH and rGBD domains with anti-Tac coated beads in isolated cells.  
532 Fluorescence intensity of IL2-AH-Cherry **(f)** and GFP-RhoA Q63L **(g)** accumulated under



533 beads (normalized to signal at the free cortex). Effect of clustering AH and rGBD on  
534 cortical dynamics of GFP-RhoA Q63L, as measured by FRAP, in isolated cells: best-fit  
535 curves (**h**), immobile fractions (**i**).

536 Data represent means  $\pm$  s.e.m and  $n = 3$  independent experiments. \* $P < 0.05$ , \*\*  $P <$   
537  $0.01$ , \*\*\* $P < 0.001$ , \*\*\*\* $P < 0.0001$ ; ns, not significant; One-way ANOVA with Dunnett's  
538 multiple comparisons test (**a,c,d**) or Tukey's multiple comparisons test (**f,g,i**). Scale bars,  
539  $5 \mu\text{m}$ .

540

541 **Extended Data Figure 6: Related to Figure 4: Cortical anchorage of anillin by**  
542 **Myosin II regulates RhoA signaling.**

543 (**a,b**) Immunostaining of anillin in cells treated with blebbistatin. Representative images  
544 (**a**) and quantified fluorescence intensity at ZA (**b**).

545 (**c,d**) FRAP of GFP-NMIIA at the ZA in cells expressing MRLC-WT or MRLC-DD: best-fit  
546 curves (**c**) and mobile fractions (**d**).

547 (**e**) Immunoblot of anillin and mCherry in MCF-7 cells expressing mCherry tagged  
548 MRLC-WT or MRLC-DD. GAPDH serves as loading control.

549 (**f,g**) Immunostaining of TCA-RhoA in cells expressing MRLC-WT or MRLC-DD and  
550 treated with C3 transferase (C3T). Representative confocal images (**f**) and quantified  
551 fluorescence intensity of junctional RhoA (**g**)

552 (**h,i,l**) Representative images (**h**) and fluorescence intensity of TCA-RhoA (**i**) and mDia1  
553 (**l**) at the ZA in cells expressing MRLC-WT or co-expressing MRLC-DD with anillin  
554 shRNA (KD) or reconstituted anillin transgenes. Asterisks denote cells expressing the  
555 indicated transgene.

556 (**j,k**) FRAP of GFP-RhoA Q63L at the ZA in cells expressing MRLC-WT, MRLC-DD or  
557 co-expressing MRLC-DD with Anillin shRNA (KD): best-fit curves (**j**) and immobile  
558 fractions (**k**).

559 (**m,n**) Recoil measurements of cell junctions after laser ablation of junctions of cells  
560 expressing MRLC-WT or co-expressing MRLC-DD with Anillin shRNA (KD) or  
561 reconstituted Anillin transgenes (**m**). Analysis of viscous drag from recoil measurements  
562 after laser ablation (**n**).

563 Data represent means  $\pm$  s.e.m and n = 3 independent experiments. \*P < 0.05, \*\* P <  
564 0.01, \*\*\*P < 0.001, \*\*\*\*P < 0.0001; ns, not significant; Student's *t*-test (**b,d**) One-way  
565 ANOVA with Tukey's multiple comparisons test (**g,i,k,l**). Scale bars, 10  $\mu$  m.

566

567 **EXTENDED DATA MOVIE CAPTIONS**

568

569 **Movie 1:** 3D reconstruction of MCF-7 immunostained for Anillin. Anillin exhibits  
570 predominant localization to apical junctions and nuclei.

571

572 **Movie 2:** Photoactivation of junctional RhoAQ63L. Fluorescence decay of  
573 photoactivated RhoAQ63L at apical junctions shows rapid loss of fluorescence in control  
574 and Anillin KD cells with no visible lateral dispersion.

575

576

577

578

579

580

# Figure 1

a

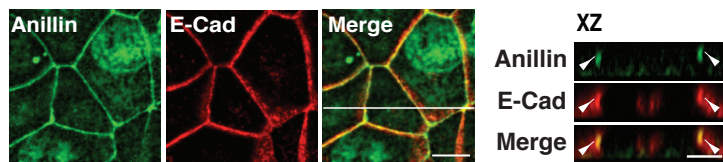

b

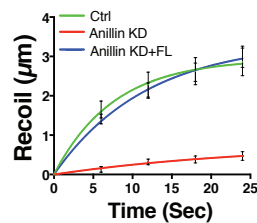

c

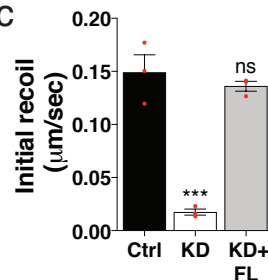

d

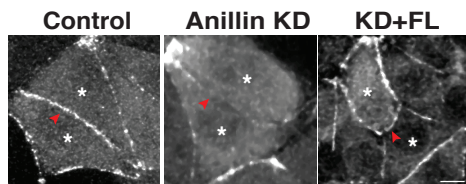

e

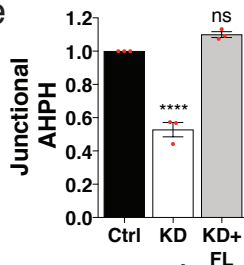

f

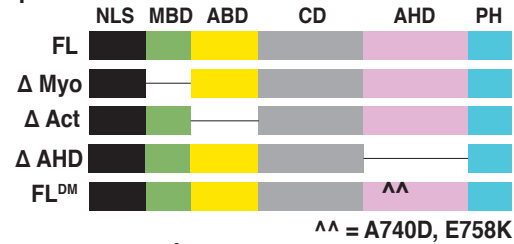

g

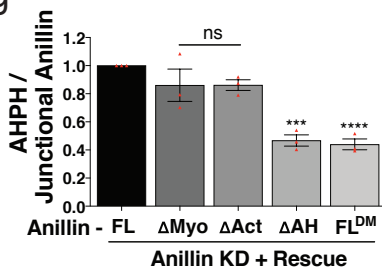

h

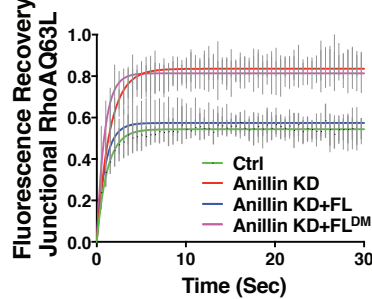

i

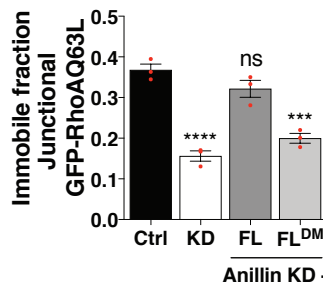

j

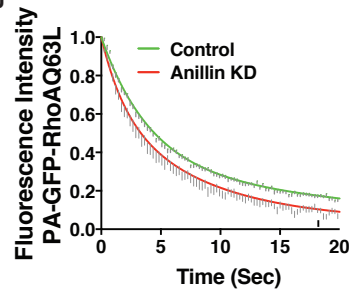

k

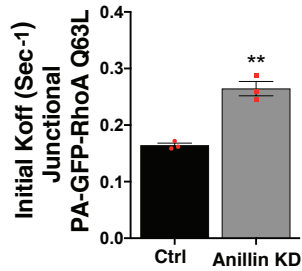

l

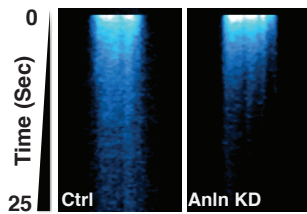

m

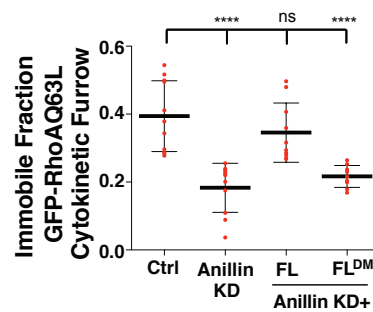

n

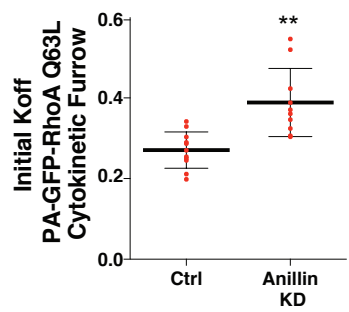

**Figure 2**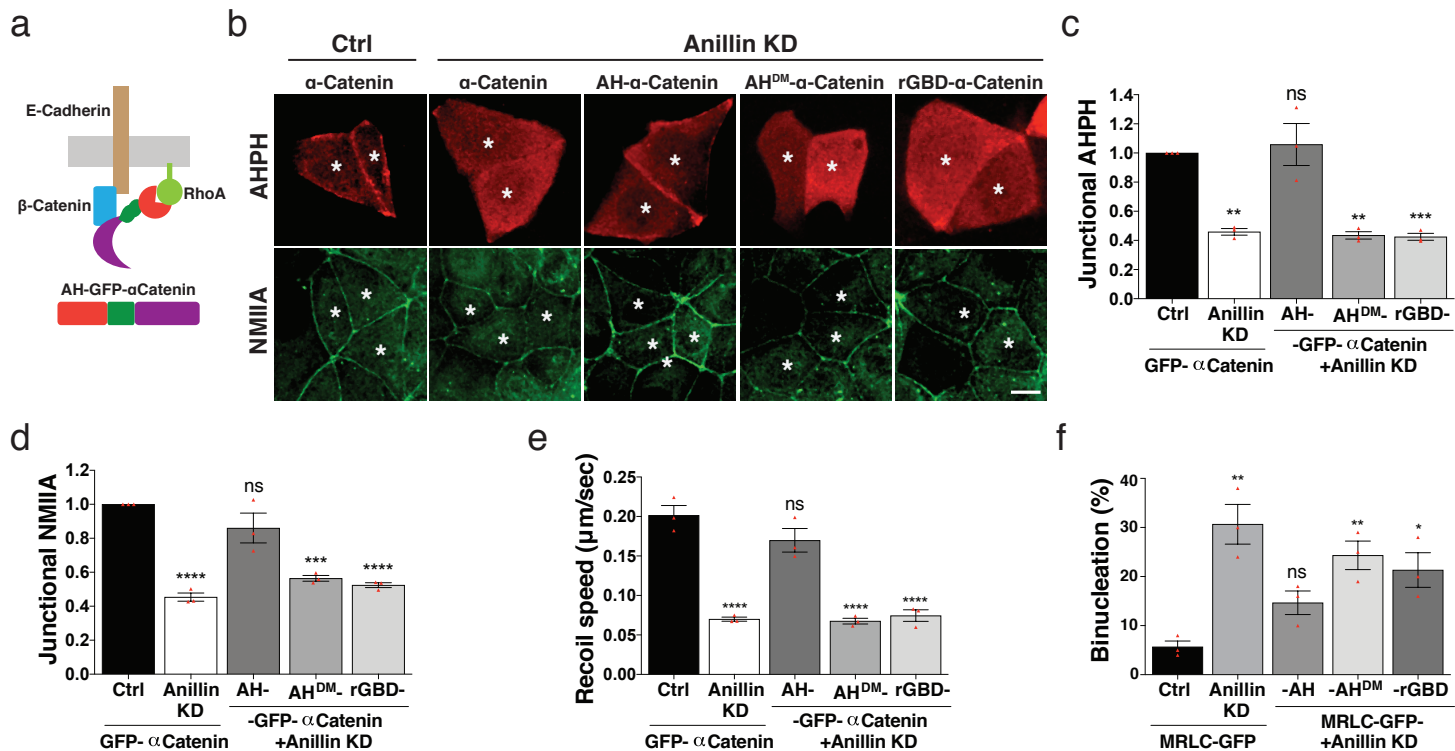

**Figure 3**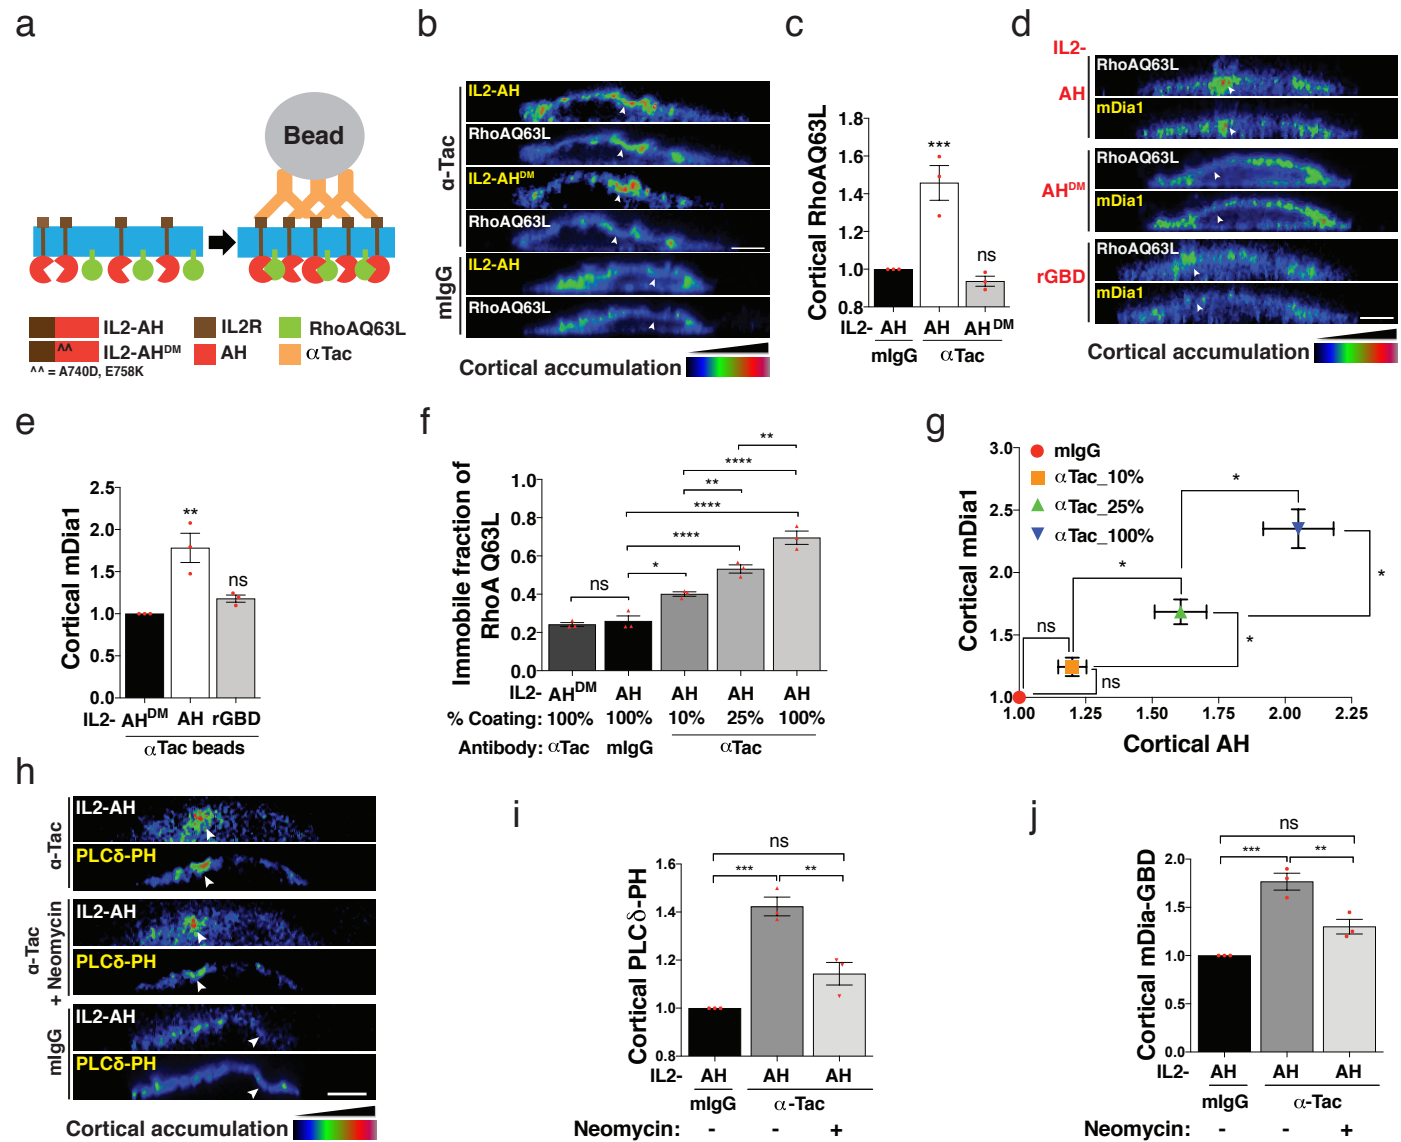

**Figure 4****a**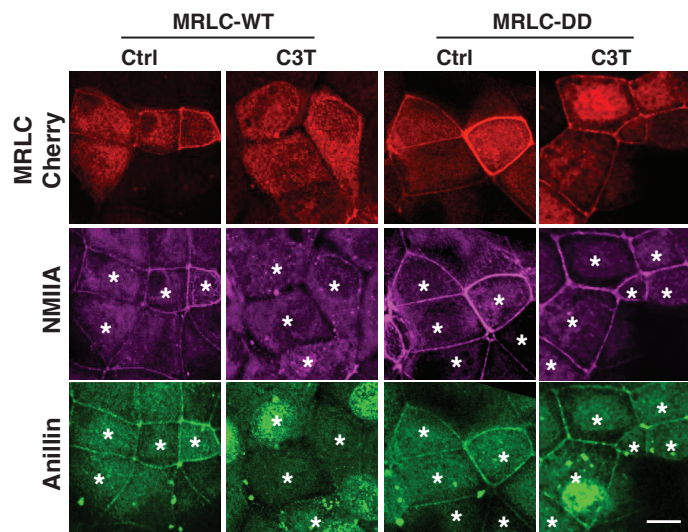**b**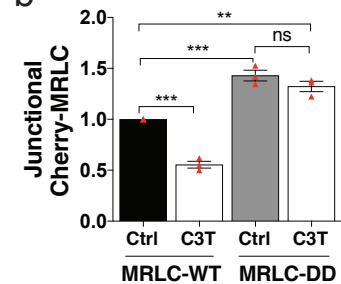**c**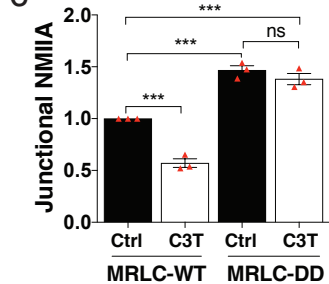**d**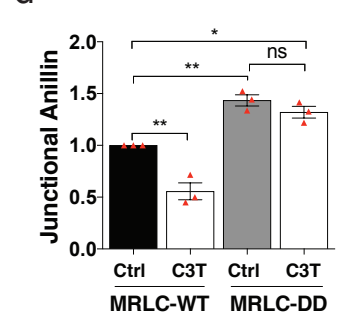**h**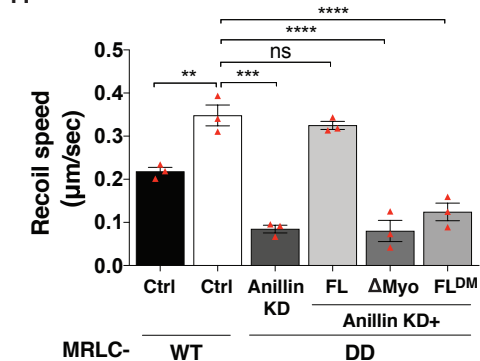**e**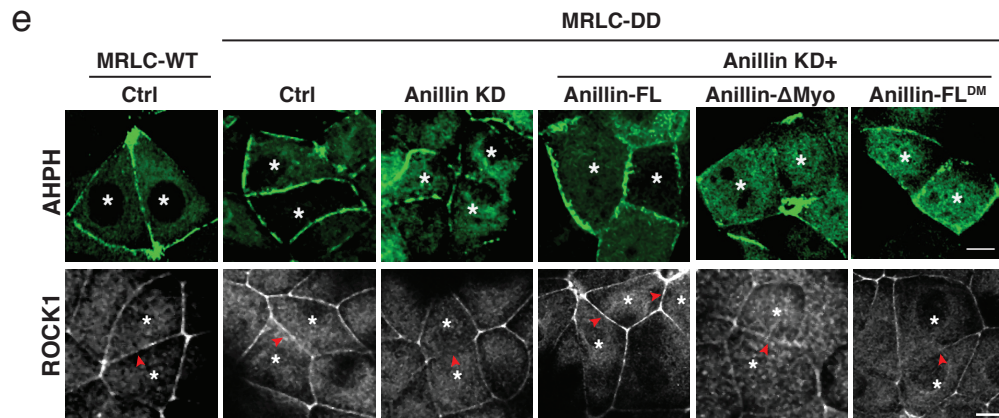**f**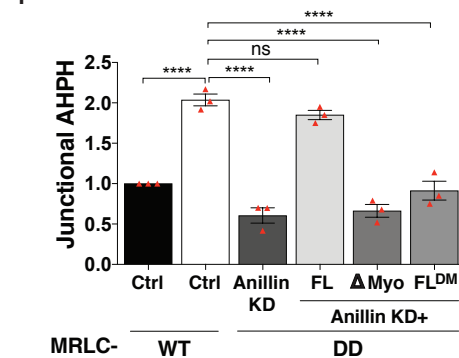**g**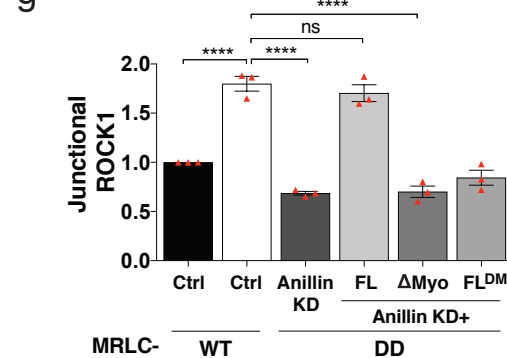**i**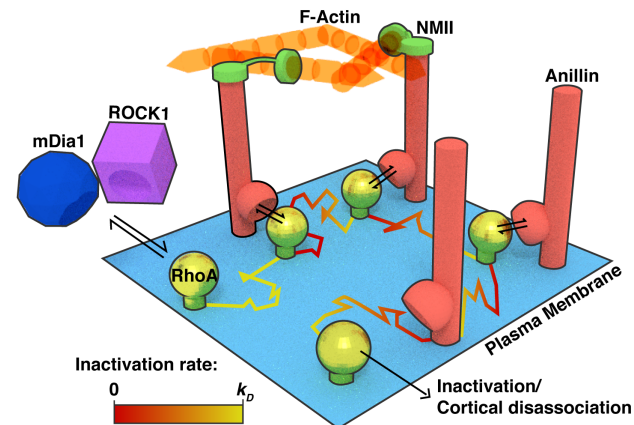

# Extended Data Figure 1

a

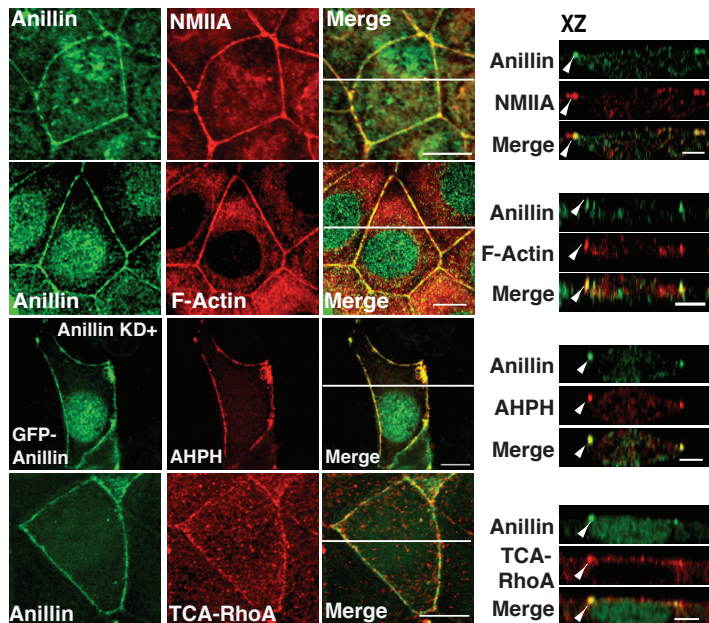

b

| Treatment     | K value              | P<0.05 |
|---------------|----------------------|--------|
| Ctrl          | 0.03899 ± 0.009, n=3 | n.s.   |
| Anillin KD    | 0.01533 ± 0.003, n=3 | n.s.   |
| Anillin KD+FL | 0.0339 ± 0.006, n=3  | n.s.   |

i

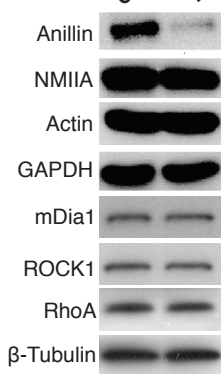

d

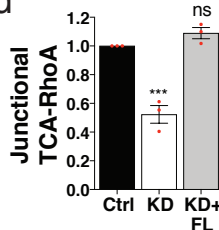

e

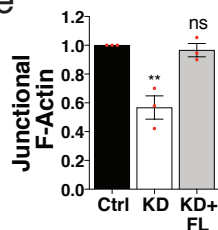

h

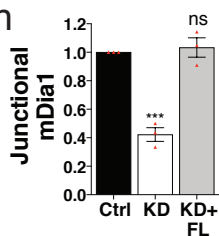

c

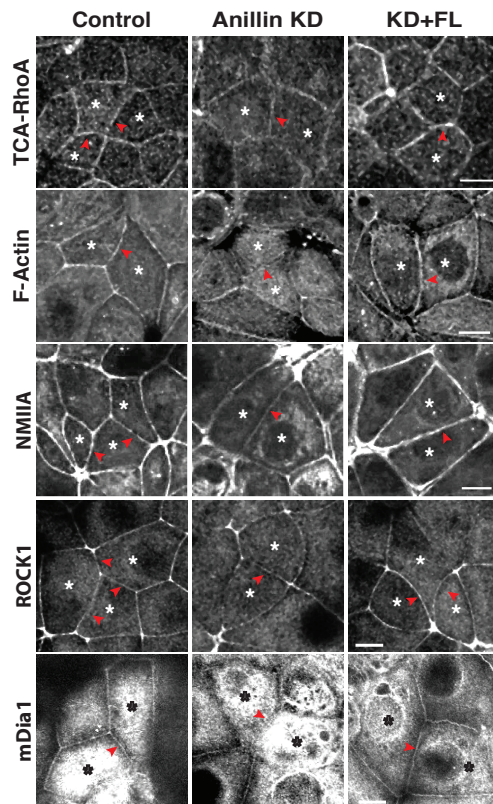

f

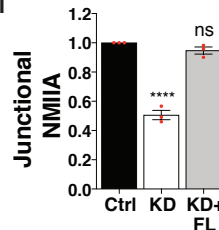

g

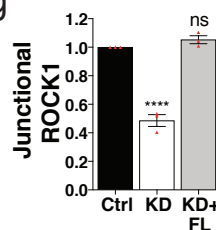

# Extended Data Figure 2

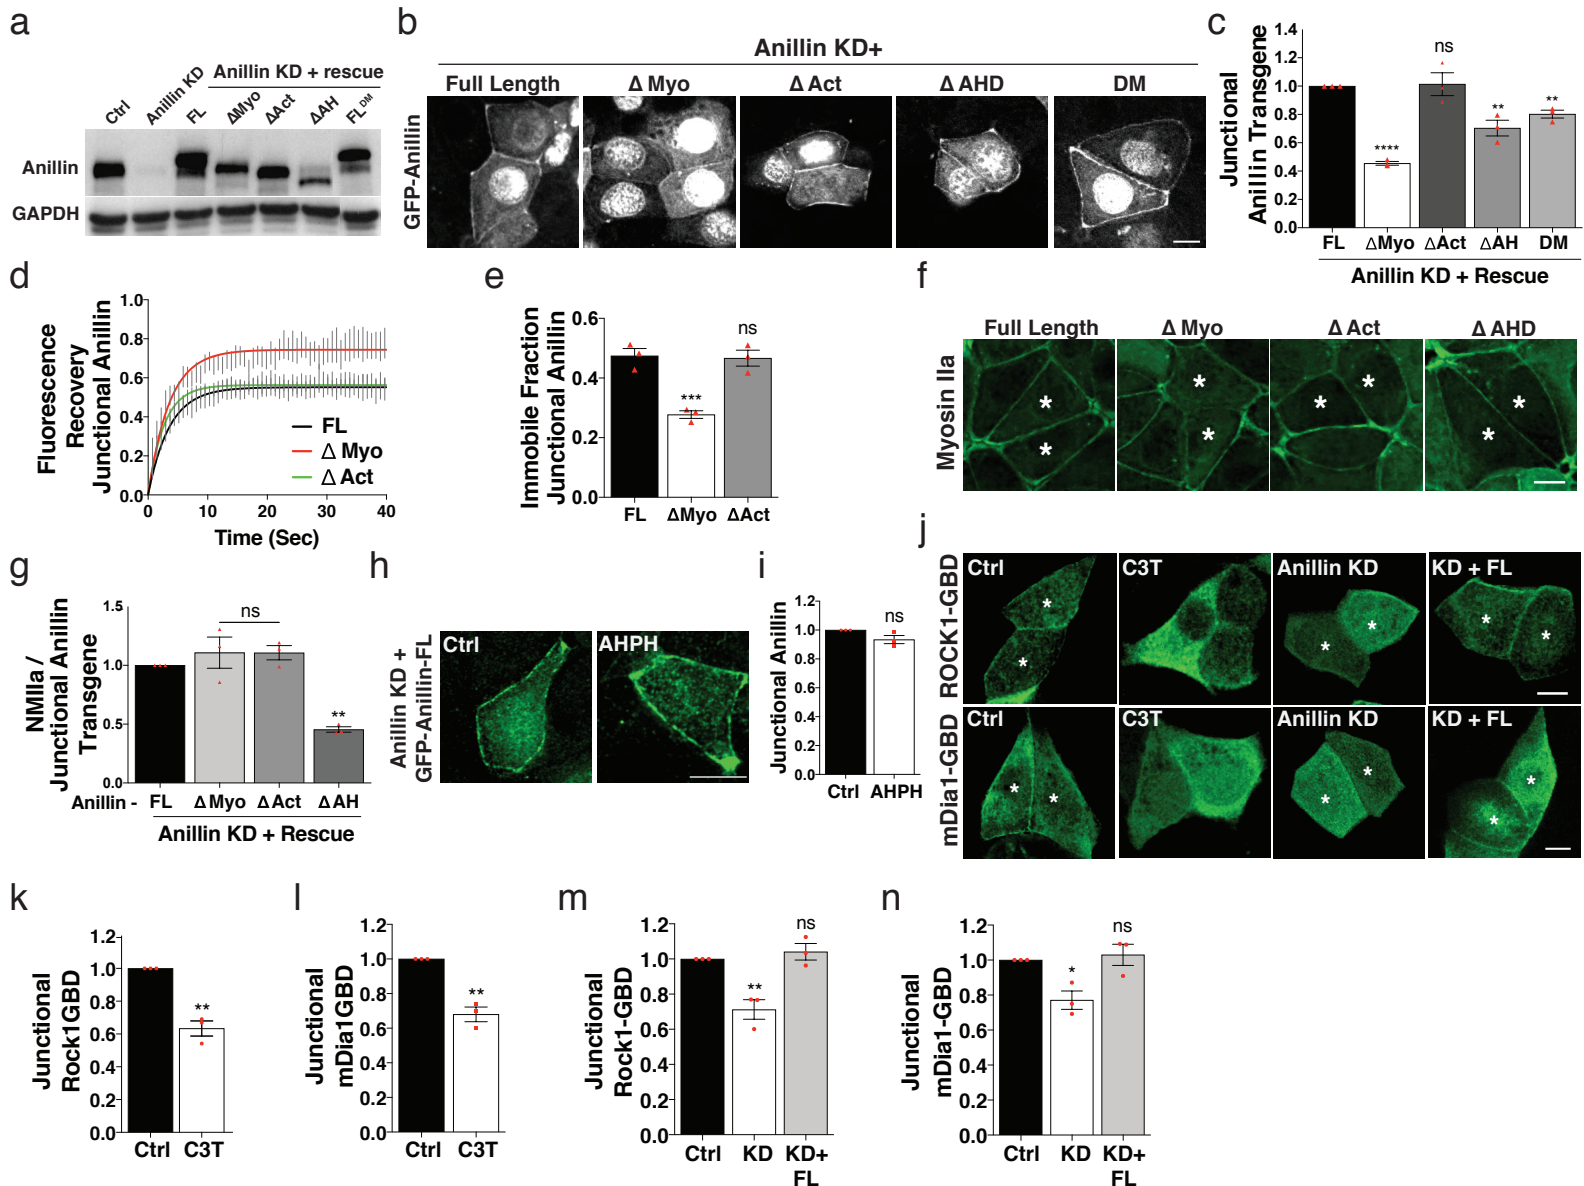



# Extended Data Figure 3

a

Anillin Knockdown+

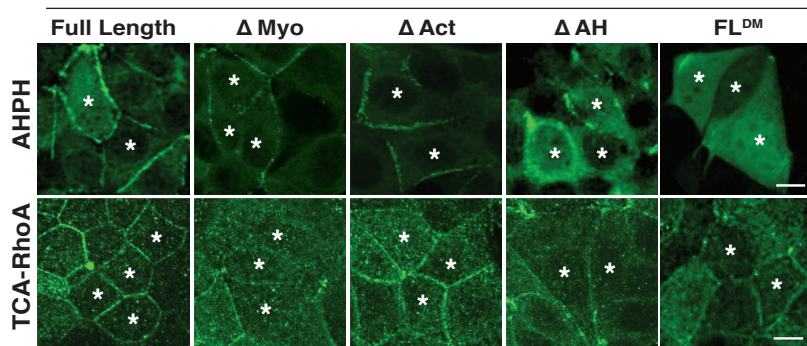

b

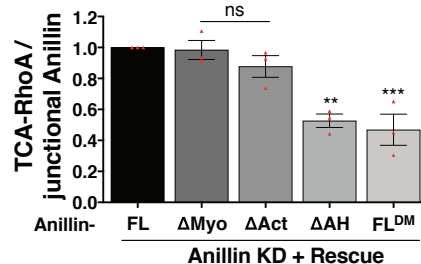

c

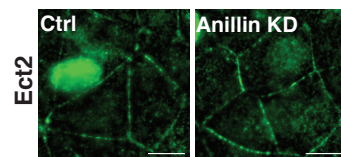

d

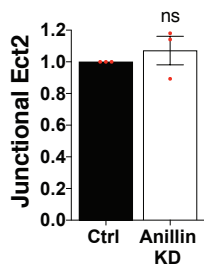

e

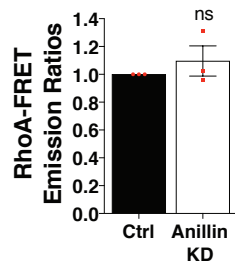

f

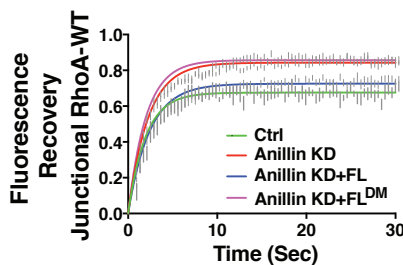

g

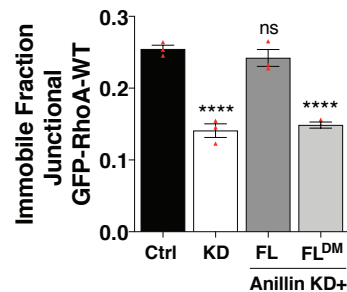

h

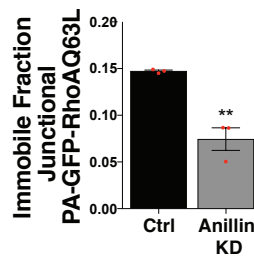

i

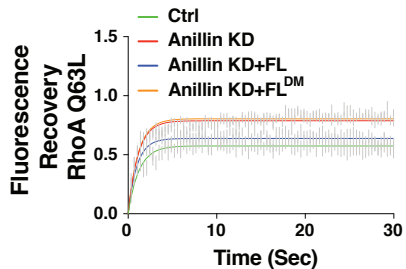

j

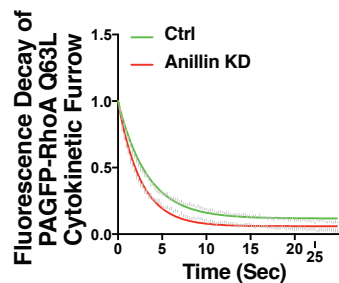

k

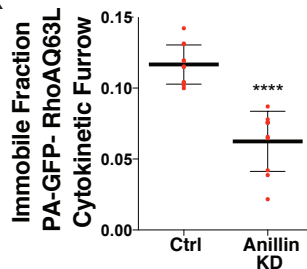

# Extended Data Figure 4

a

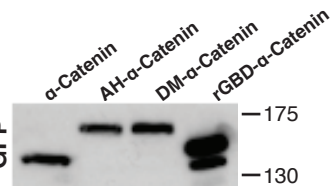

b

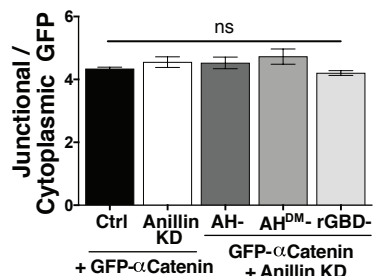

c

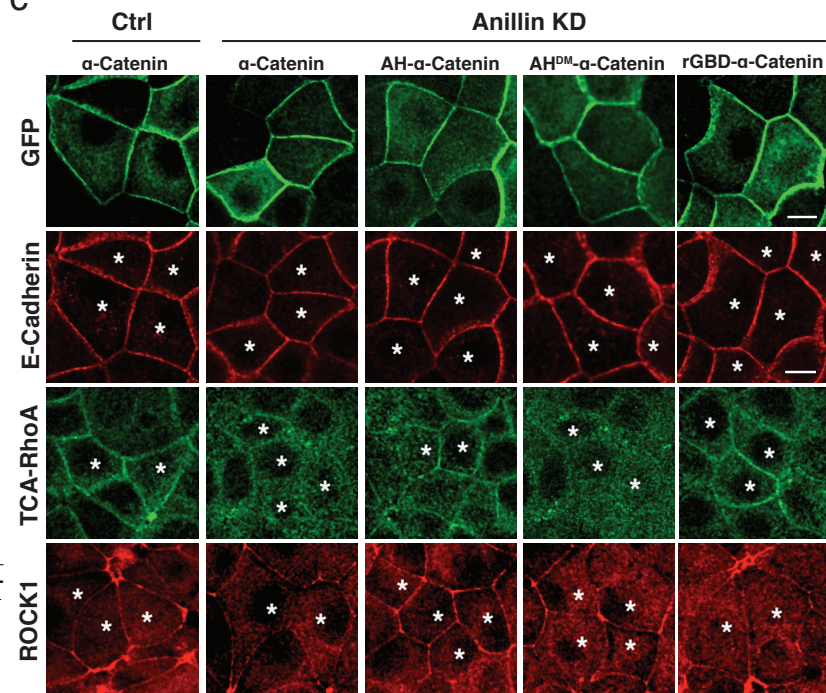

d

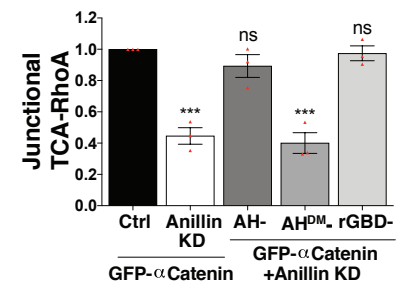

e

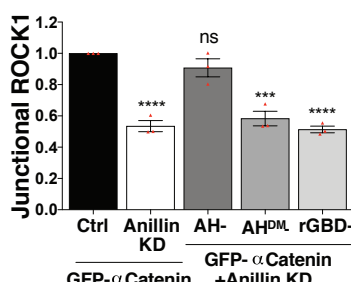

f

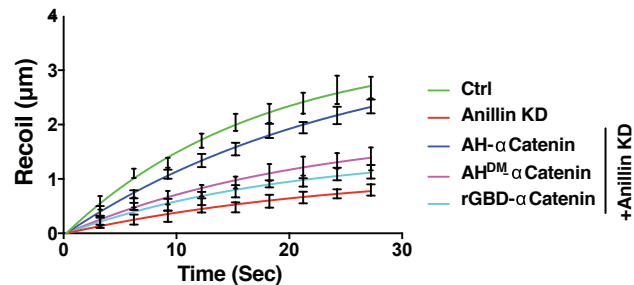

g

| Treatment                                | K value              | P<0.05 |
|------------------------------------------|----------------------|--------|
| Ctrl + α-Catenin                         | 0.0431 ± 0.005, n=3  | n.s.   |
| Anillin KD + α-Catenin                   | 0.04241 ± 0.009, n=3 | n.s.   |
| Anillin KD + AH-α-Catenin                | 0.03463 ± 0.002, n=3 | n.s.   |
| Anillin KD + AH <sup>DM</sup> -α-Catenin | 0.03965 ± 0.007, n=3 | n.s.   |
| Anillin KD + rGBD-α-Catenin              | 0.04635 ± 0.004, n=3 | n.s.   |

# Extended Data Figure 5

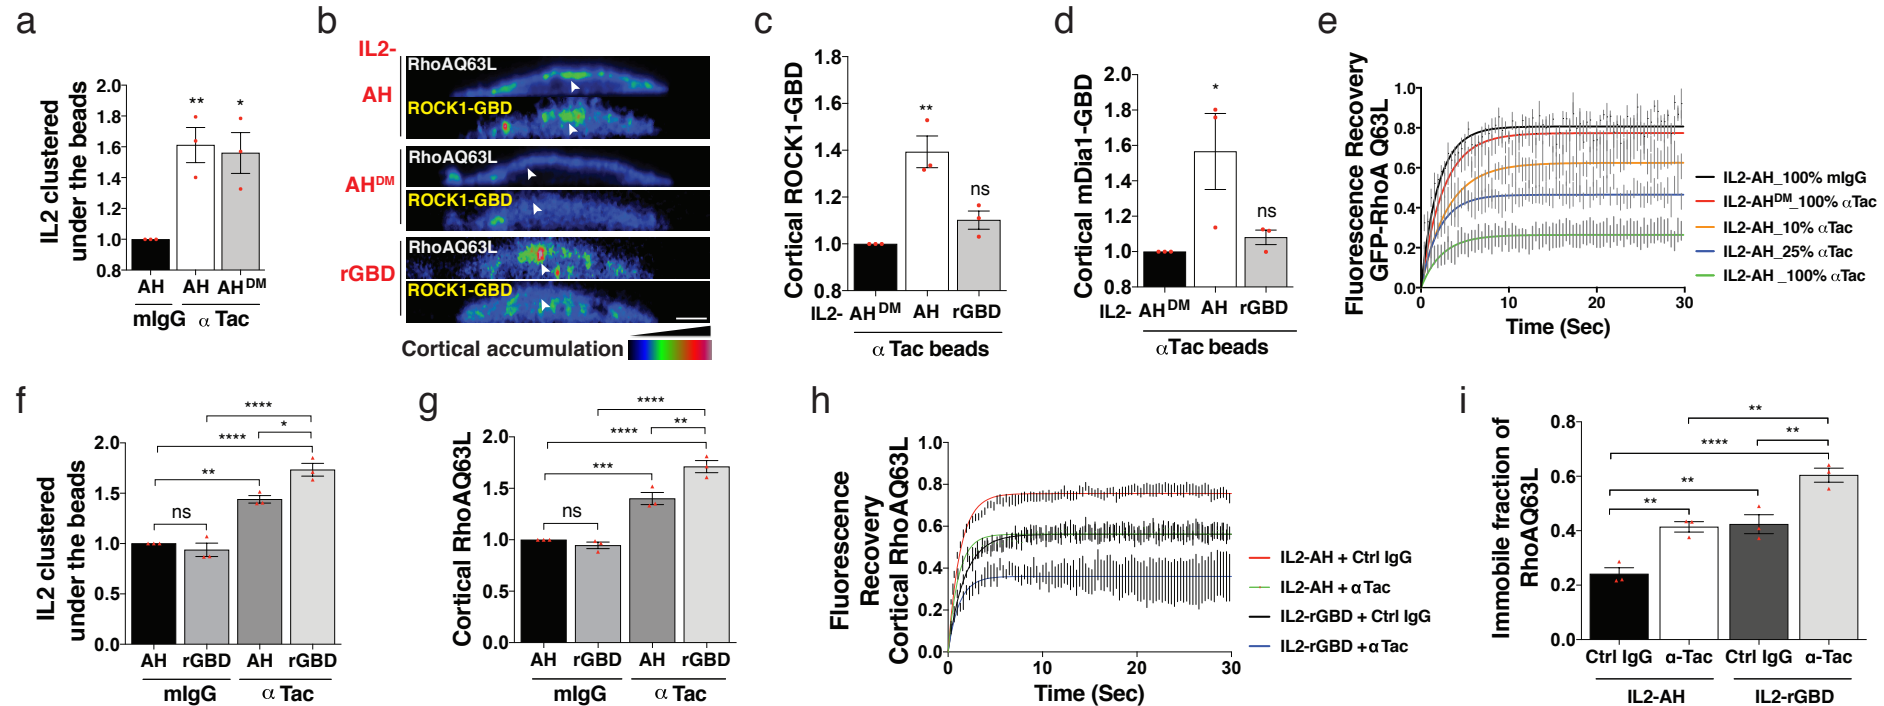

# Extended Data Figure 6

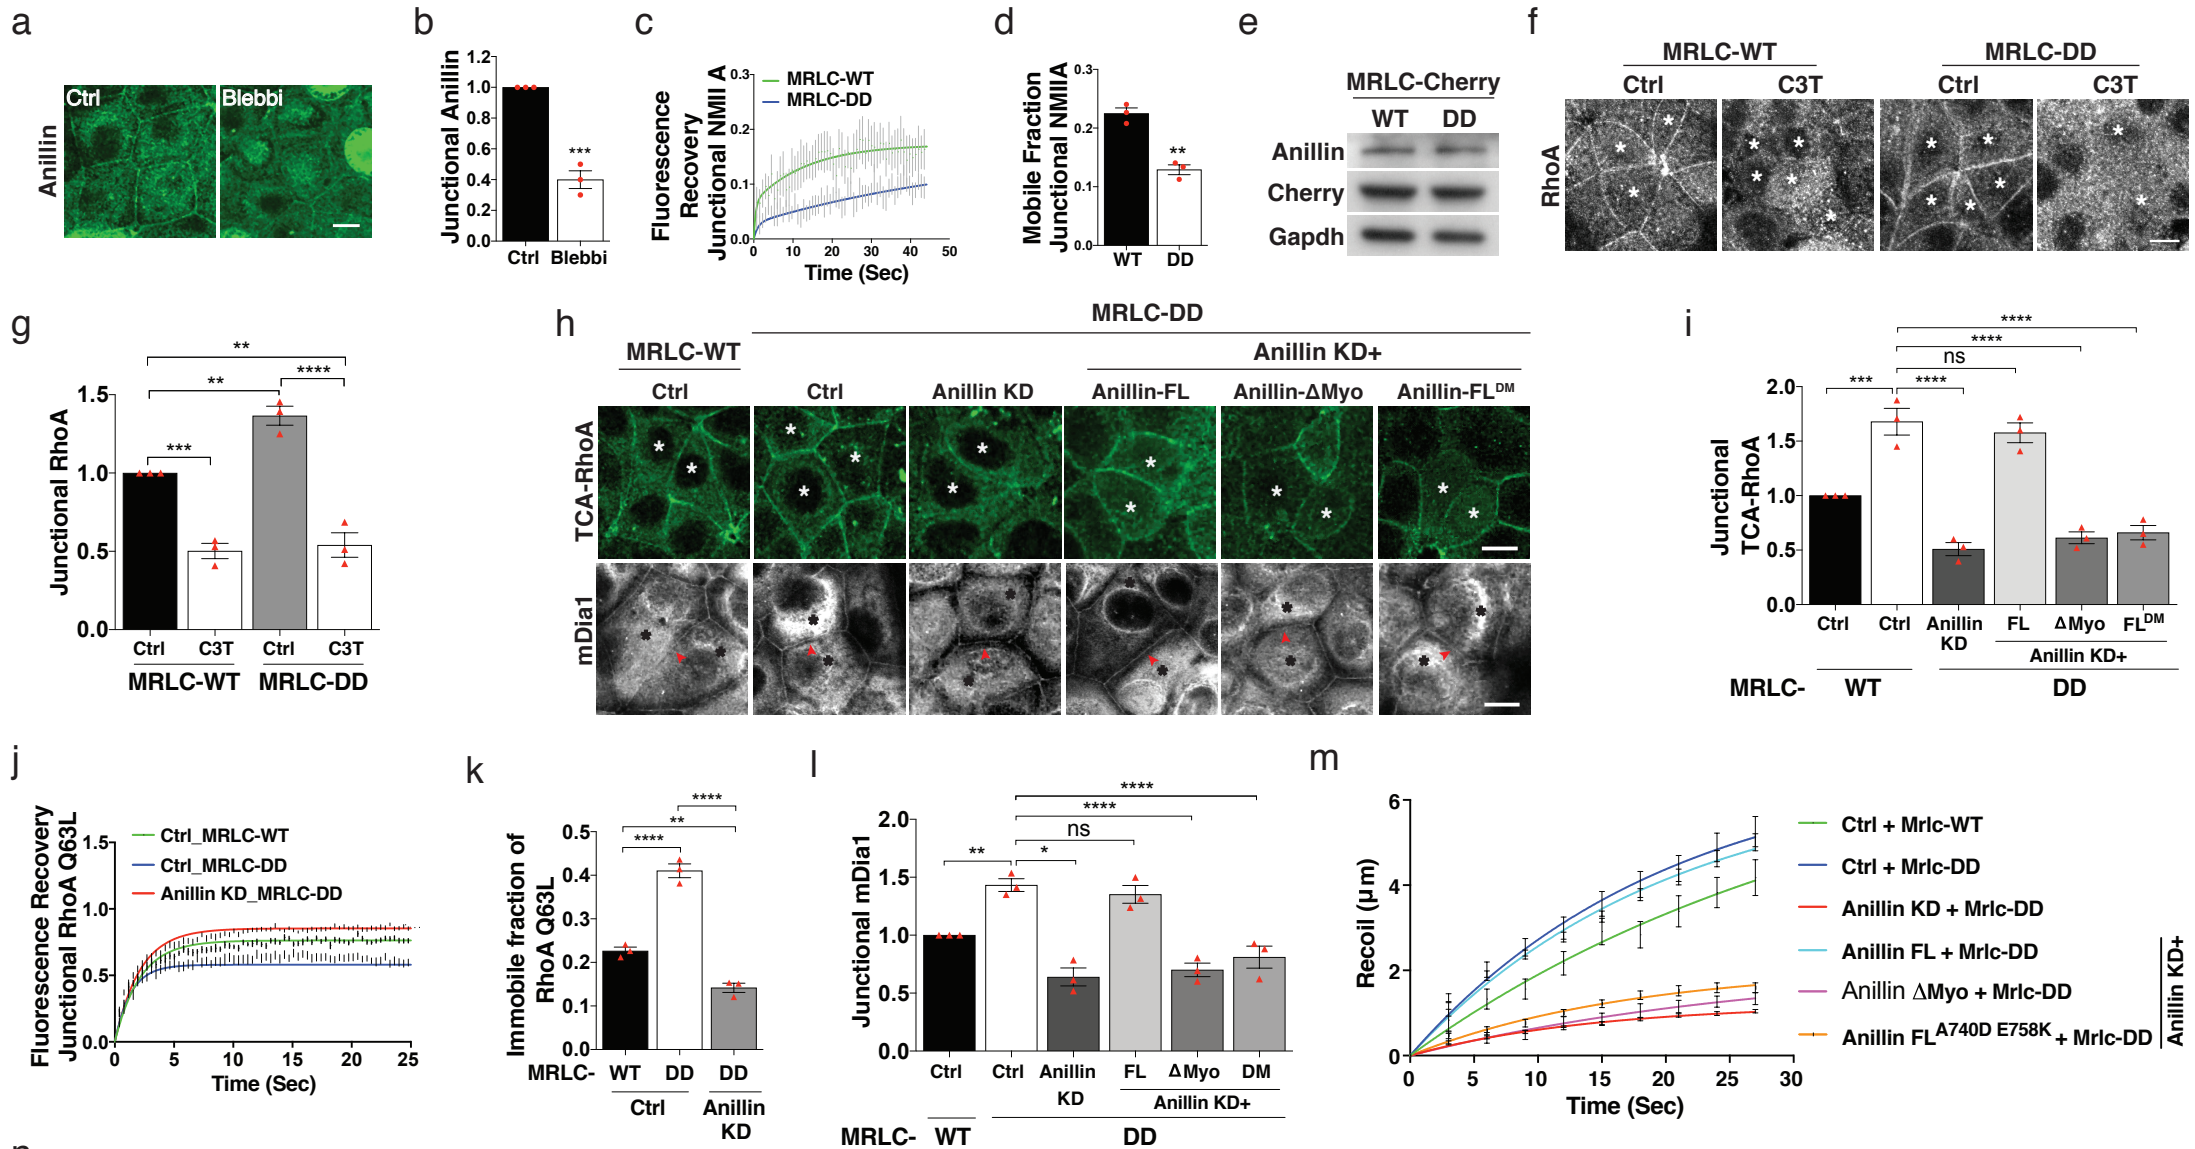

Source: http://biorxiv.org/content/10.1101/282756v1.full.pdf
